# Supplementary material for: A Guide to a Pharmacist-Led Pharmacogenetic Testing and Counselling Service in an Interprofessional Healthcare Setting
Source: MDPI journal article supplement (doi:10.3390/pharmacy10040086), 2022-07-19
Supplement: s1 [file s1]

## Supplementary Material

**Table S1.** Stratipharma® (humatrix AG, Pfungstadt, Germany) SNPs and annotations

| Gene    | Chromosome          | Annotation | Position                   | Amino acid replacement | Base |
|---------|---------------------|------------|----------------------------|------------------------|------|
| ABCB1   | Chromosom 7q21.12   | rs1045642  | NM_000927.4:c.3435T>C      | I1145I                 | T>C  |
| ABCB1   | Chromosom 7q21.12   | rs1128503  | NM_000927.4:c.1236T>C      | G412G                  | T>C  |
| ABCB1   | Chromosom 7q21.12   | rs2032582  | NM_000927.4:c.2677G>A      | A893T                  | G>A  |
| ABCB1   | Chromosom 7q21.12   | rs2032582  | NM_000927.4:c.2677G>T      | A893S                  | G>T  |
| ABCB1   | Chromosom 7q21.12   | rs2032583  | NM_000927.4:c.2685+49T>C   | -                      | T>C  |
| ABCG2   | Chromosom 4q22-q23  | rs2231142  | NM_004827.2:c.421C>A       | Q141K                  | C>A  |
| ABCG2   | Chromosom 4q22-q23  | rs13120400 | NM_004827.2:c.1194+928A>G  | -                      | A>G  |
| ABCG2   | Chromosom 4q22-q23  | rs17731538 | NC_000004.11:g.89055379G>A | -                      | G>A  |
| ADRB1   | Chromosom 10q24-q26 | rs1801252  | NM_000684.2:c.145A>G       | S49G                   | A>G  |
| ADRB1   | Chromosom 10q24-q26 | rs1801253  | NM_000684.2:c.1165G>C      | G389R                  | G>C  |
| ADRB2   | Chromosom 5q31-q32  | rs1042713  | NT_029289.11:g.9369367G>A  | G16R                   | G>A  |
| ADRB2   | Chromosom 5q31-q32  | rs1042714  | NC_000005.9:g.148206473G>C | E27Q                   | G>C  |
| COMT    | Chromosom 22q11.21  | rs4680     | NM_000754.3:c.472G>A       | V158M                  | G>A  |
| COMT    | Chromosom 22q11.21  | rs165599   | NM_000754.3:c.*522G>A      | -                      | G>A  |
| COMT    | Chromosom 22q11.21  | rs4646316  | NM_000754.3:c.615+310C>T   | -                      | C>T  |
| COMT    | Chromosom 22q11.21  | rs9332377  | NM_000754.3:c.616-367C>T   | -                      | C>T  |
| COQ2    | Chromosom 4q21.23   | rs4693075  | NC_000004.11:g.84192168G>C | -                      | G>C  |
| COQ2    | Chromosom 4q21.23   | rs6535454  | NM_015697.7:c.894T>C       | D298D                  | T>C  |
| CYP1A2  | Chromosom 15q24.1   | rs2069514  | NC_000015.9:g.75038220G>A  | -                      | G>A  |
| CYP1A2  | Chromosom 15q24.1   | rs762551   | NC_000015.9:g.75041917C>A  | -                      | C>A  |
| CYP2B6  | Chromosom 19q13.2   | rs8192709  | NM_000767.4:c.64C>T        | R22C                   | C>T  |
| CYP2B6  | Chromosom 19q13.2   | rs28399499 | NM_000767.4:c.983T>C       | I328T                  | T>C  |
| CYP2B6  | Chromosom 19q13.2   | rs3745274  | NM_000767.4:c.516G>T       | Q172H                  | G>T  |
| CYP2C8  | Chromosom 10q24.1   | rs10509681 | NM_000770.3:c.1196A>G      | K399R                  | A>G  |
| CYP2C8  | Chromosom 10q24.1   | rs11572080 | NM_000770.3:c.416G>A       | R139K                  | G>A  |
| CYP2C8  | Chromosom 10q24.1   | rs1934951  | NG_007972.1:g.35707G>A     | -                      | G>A  |
| CYP2C9  | Chromosom 10q24.1   | rs1799853  | NM_000771.3:c.430C>T       | R144C                  | C>T  |
| CYP2C9  | Chromosom 10q24.1   | rs1057910  | NM_000771.3:c.1075A>C      | I359L                  | A>C  |
| CYP2C9  | Chromosom 10q24.1   | rs9332131  | NM_000771.3:c.817delA      | K273X                  | delA |
| CYP2C9  | Chromosom 10q24.1   | rs7900194  | NM_000771.3:c.449G>A       | R150H                  | G>A  |
| CYP2C9  | Chromosom 10q24.1   | rs28371685 | NM_000771.3:c.1003C>T      | R335W                  | C>T  |
| CYP2C19 | Chromosom 10q24     | rs4244285  | NM_000769.1:c.681G>A       | -                      | G>A  |
| CYP2C19 | Chromosom 10q24     | rs4986893  | NM_000769.1:c.636G>A       | W212X                  | G>A  |
| CYP2C19 | Chromosom 10q24     | rs12248560 | NG_008384.1:g.4195C>T      | -                      | C>T  |
| CYP2C19 | Chromosom 10q24     | rs28399504 | NM_000769.1:c.1A>G         | M1V                    | A>G  |

|        |                      |             |                              |         |             |
|--------|----------------------|-------------|------------------------------|---------|-------------|
| CYP2D6 | Chromosom 22q13.1    | -           | copy number variation        | -       | CNV         |
| CYP2D6 | Chromosom 22q13.1    | rs35742686  | NM_000106.4:c.775delA        | -       | delA        |
| CYP2D6 | Chromosom 22q13.1    | rs3892097   | NM_000106.4:c.506-1G>A       | -       | G>A         |
| CYP2D6 | Chromosom 22q13.1    | rs5030655   | NM_000106.4:c.454delT        | -       | delT        |
| CYP2D6 | Chromosom 22q13.1    | rs5030867   | NM_000106.4:c.971A>C         | H324P   | A>C         |
| CYP2D6 | Chromosom 22q13.1    | rs5030865   | NM_000106.4:c.505G>T         | G169X   | G>T         |
| CYP2D6 | Chromosom 22q13.1    | rs5030865   | NM_000106.4:c.505G>A         | G169R   | G>A         |
| CYP2D6 | Chromosom 22q13.1    | rs5030656   | NM_000106.5:c.841_843delAAG  | K281del | delAAG      |
| CYP2D6 | Chromosom 22q13.1    | rs1065852   | NM_000106.4:c.100C>T         | P34S    | C>T         |
| CYP2D6 | Chromosom 22q13.1    | rs201377835 | NM_000106.5:c.181-1G>C       | -       | G>C         |
| CYP2D6 | Chromosom 22q13.1    | rs28371706  | NM_000106.4:c.320C>T         | T107I   | C>T         |
| CYP2D6 | Chromosom 22q13.1    | rs59421388  | NM_000106.4:c.1012G>A        | V338M   | G>A         |
| CYP2D6 | Chromosom 22q13.1    | rs28371725  | NM_000106.4:c.985+39G>A      | -       | G>A         |
| CYP3A4 | Chromosom 7q21.1     | rs2740574   | NG_000004.3:g.135607G>A      | -       | G>A         |
| CYP3A4 | Chromosom 7q21.1     | rs2242480   | NM_017460.5:c.1026+12G>A     | -       | G>A         |
| CYP3A5 | Chromosom 7q21.1     | rs776746    | NM_000777.3:c.219-237G>A     | -       | G>A         |
| DPYD   | Chromosom 1p22       | rs3918290   | NM_000110.3:c.1905+1G>A      | -       | G>A         |
| DPYD   | Chromosom 1p22       | rs72549303  | NM_000110.3:c.1898delC       | -       | delC        |
| DPYD   | Chromosom 1p22       | rs72549309  | NM_000110.3:c.298delTinsTCAT | -       | delTinsTCAT |
| DPYD   | Chromosom 1p22       | rs55886062  | NM_000110.3:c.1679T>G        | I560S   | T>G         |
| DPYD   | Chromosom 1p22       | rs67376798  | NM_000110.3:c.2846A>T        | D949V   | A>T         |
| DPYD   | Chromosom 1p22       | rs2297595   | NM_000110.3:c.496A>G         | M166V   | A>G         |
| GNB3   | Chromosom 12p13      | rs5443      | NM_002075.2:c.825C>T         | S275S   | C>T         |
| GSTP1  | Chromosom 11q13.2    | rs1695      | NM_000852.3:c.313A>G         | I105V   | A>G         |
| HLA-A  | Chromosom 6p21.3     | rs1061235   | NM_002116.7:c.*66A>T         | -       | A>T         |
| HLA-A  | Chromosom 6p21.3     | rs1633021   | NC_000006.12:g.29779092T>C   | -       | T>C         |
| HLA-B  | Chromosom 6p21.3     | rs3909184   | NM_005803.2:c.724-507C>G     | -       | C>G         |
| HLA-B  | Chromosom 6p21.3     | rs2395029   | NM_006674.3:c.*568T>G        | -       | T>G         |
| HLA-B  | Chromosom 6p21.3     | rs2844682   | NC_000006.11:g.30946148G>A   | -       | G>A         |
| HMGCR  | Chromosom 5q13.3-q14 | rs17238540  | NM_000859.2:c.2457+117T>G    | -       | T>G         |
| HMGCR  | Chromosom 5q13.3-q14 | rs17244841  | NM_000859.2:c.451-174A>T     | -       | A>T         |
| HTR2A  | Chromosom 13q14-q21  | rs6311      | NC_000013.10:g.47471478C>T   | -       | C>T         |
| HTR2A  | Chromosom 13q14-q21  | rs6313      | NM_000621.3:c.102C>T         | S34S    | C>T         |
| HTR2A  | Chromosom 13q14-q21  | rs7997012   | NM_000621.3:c.614-2211T>C    | -       | T>C         |
| HTR2A  | Chromosom 13q14-q21  | rs9316233   | NC_000013.10:g.47433355C>G   | -       | C>G         |
| HTR2A  | Chromosom 13q14-q21  | rs6314      | NC_000013.10:g.47409034G>A   | H368Y   | G>A         |
| IFNL3  | Chromosom 19q13.13   | rs8099917   | NC_000019.9:g.39743165T>G    | -       | T>G         |
| IFNL3  | Chromosom 19q13.13   | rs12979860  | NC_000019.9:g.39738787C>T    | -       | C>T         |
| ITPA   | Chromosom 20p        | rs1127354   | NM_181493.1:c.43C>A          | P32T    | C>A         |

|                |                    |                   |                           |       |     |
|----------------|--------------------|-------------------|---------------------------|-------|-----|
| <b>NAT2</b>    | Chromosom 8p22     | <b>rs1801280</b>  | NM_000015.2:c.341T>C      | I114T | T>C |
| <b>NAT2</b>    | Chromosom 8p22     | <b>rs1799930</b>  | NM_000015.2:c.590G>A      | R197Q | G>A |
| <b>NAT2</b>    | Chromosom 8p22     | <b>rs1799931</b>  | NM_000015.2:c.857G>A      | G286E | G>A |
| <b>OPRM1</b>   | Chromosom 6q24-q25 | <b>rs1799971</b>  | NM_000914.3:c.118A>G      | N40D  | A>G |
| <b>SLC19A1</b> | Chromosom 21q22.3  | <b>rs1051266</b>  | NM_194255.1:c.80A>G       | H27R  | A>G |
| <b>SLCO1B1</b> | Chromosom 12p12    | <b>rs4149056</b>  | NM_006446.4:c.521T>C      | V174A | T>C |
| <b>SLCO1B1</b> | Chromosom 12p12    | <b>rs11045819</b> | NM_006446.4:c.463C>A      | P155T | C>A |
| <b>SLCO1B1</b> | Chromosom 12p12    | <b>rs2306283</b>  | NM_006446.4:c.388A>G      | N130D | A>G |
| <b>SLCO1B1</b> | Chromosom 12p12    | <b>rs4149015</b>  | NG_011745.1:g.4195G>A     | -     | G>A |
| <b>TPMT</b>    | Chromosom 6p22.3   | <b>rs1800462</b>  | NM_000367.2:c.238G>C      | A80P  | G>C |
| <b>TPMT</b>    | Chromosom 6p22.3   | <b>rs1800460</b>  | NM_000367.2:c.460G>A      | A154T | G>A |
| <b>TPMT</b>    | Chromosom 6p22.3   | <b>rs1142345</b>  | NM_000367.2:c.719A>G      | Y240C | A>G |
| <b>TPMT</b>    | Chromosom 6p22.3   | <b>rs1800584</b>  | NM_000367.2:c.626-1G>A    | -     | G>A |
| <b>TPMT</b>    | Chromosom 6p22.3   | <b>rs12201199</b> | NM_000367.2:c.419+94T>A   | -     | T>A |
| <b>VKORC1</b>  | Chromosom 16p11.2  | <b>rs9923231</b>  | NC_000016.9:g.31107689C>T | -     | C>T |
| <b>VKORC1</b>  | Chromosom 16p11.2  | <b>rs7294</b>     | NM_024006.4:c.*134G>A     | -     | G>A |
| <b>VKORC1</b>  | Chromosom 16p11.2  | <b>rs17708472</b> | NM_024006.4:c.173+525C>T  | -     | C>T |
| <b>VKORC1</b>  | Chromosom 16p11.2  | <b>rs2359612</b>  | NM_024006.4:c.283+837T>C  | -     | T>C |
| <b>VKORC1</b>  | Chromosom 16p11.2  | <b>rs8050894</b>  | NM_024006.4:c.283+124G>C  | -     | G>C |
| <b>VKORC1</b>  | Chromosom 16p11.2  | <b>rs9934438</b>  | NM_024006.4:c.174-136C>T  | -     | C>T |
